# Supplementary material for: Synthesis of novel multifunctional carbazole-based molecules and their thermal, electrochemical and optical properties
Source: publisher site journal article supplement (doi:10.3762/bjoc.16.93), 2020-05-19
Supplement: Additional file 1 [file 1860-5397-16-93-S1.pdf]

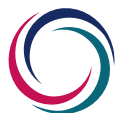

## Supporting Information

for

### **Synthesis of novel multifunctional carbazole-based molecules and their thermal, electrochemical and optical properties**

Nuray Altinolcek, Ahmet Battal, Mustafa Tavasli, William J. Peveler, Holly A. Yu and Peter J. Skabara

*Beilstein J. Org. Chem.* **2020**, *16*, 1066–1074. doi:10.3762/bjoc.16.93

### **NMR, FTIR, MS and HRMS spectra of compounds and relative quantum yield calculations**

## Table of contents

|                                                         |             |                                                                                                                       |    |
|---------------------------------------------------------|-------------|-----------------------------------------------------------------------------------------------------------------------|----|
| 1. $^1\text{H}$ and $^{13}\text{C}$ NMR spectra         | Figure S1:  | $^1\text{H}$ NMR spectrum of 3-bromocarbazole ( <b>2</b> )                                                            | S3 |
|                                                         | Figure S2:  | $^1\text{H}$ NMR spectrum of 3-bromo- <i>N</i> -hexylcarbazole ( <b>4</b> )                                           | S3 |
|                                                         | Figure S3:  | $^1\text{H}$ NMR spectrum of <i>N</i> -hexylcarbazole-3-yl-boronic acid pinocolate ester ( <b>5</b> )                 | S4 |
|                                                         | Figure S4:  | $^1\text{H}$ NMR spectrum of compound <b>7a</b>                                                                       | S4 |
|                                                         | Figure S5:  | $^{13}\text{C}$ NMR spectrum of compound <b>7a</b>                                                                    | S5 |
|                                                         | Figure S6:  | $^1\text{H}$ NMR spectrum of compound <b>7b</b>                                                                       | S5 |
|                                                         | Figure S7:  | $^{13}\text{C}$ NMR spectrum of compound <b>7b</b>                                                                    | S5 |
| 2. FTIR spectra                                         | Figure S8:  | FTIR spectrum of compounds <b>7a</b> and <b>7b</b>                                                                    | S6 |
| 3. Mass and HRMS spectra                                | Figure S9:  | Mass spectrum of compound <b>7b</b>                                                                                   | S6 |
|                                                         | Figure S10: | HRMS result of compound <b>7b</b>                                                                                     | S6 |
| 4. Calculations of relative fluorescence quantum yields | Figure S11: | Absorption at 355 nm-integrated emission of samples ( <b>7a</b> and <b>7b</b> ) and reference (rhodamine B)           | S7 |
|                                                         | Table S1:   | Optical density and integrated PL intensity values of reference (rhodamine B) and samples ( <b>7a</b> and <b>7b</b> ) | S8 |
|                                                         | Figure S12: | Absorption spectra of rhodamine B, <b>7a</b> and <b>7b</b>                                                            | S8 |
|                                                         | Figure S13: | Emission (PL) spectra of rhodamine B, <b>7a</b> and <b>7b</b> , excited at 355 nm                                     | S8 |

# 1. $^1\text{H}$ and $^{13}\text{C}$ NMR spectra

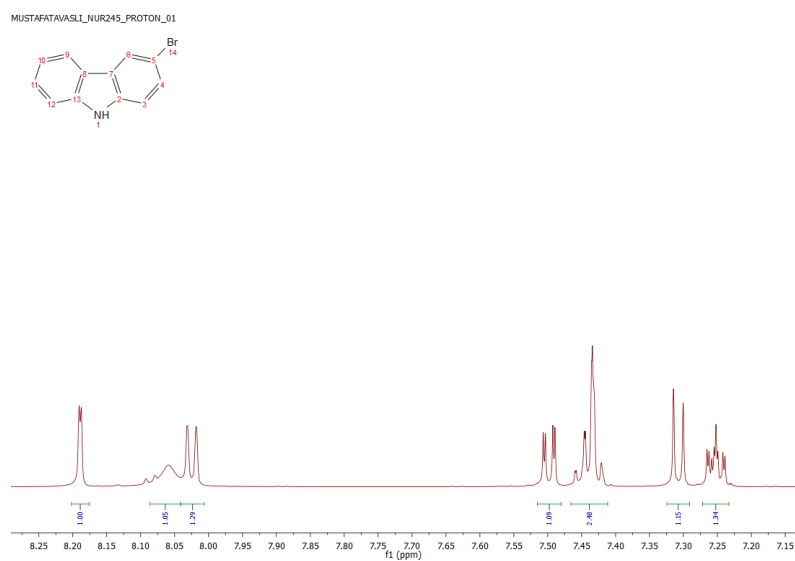

**Figure S1:**  $^1\text{H}$  NMR spectrum of 3-bromocarbazole (2).

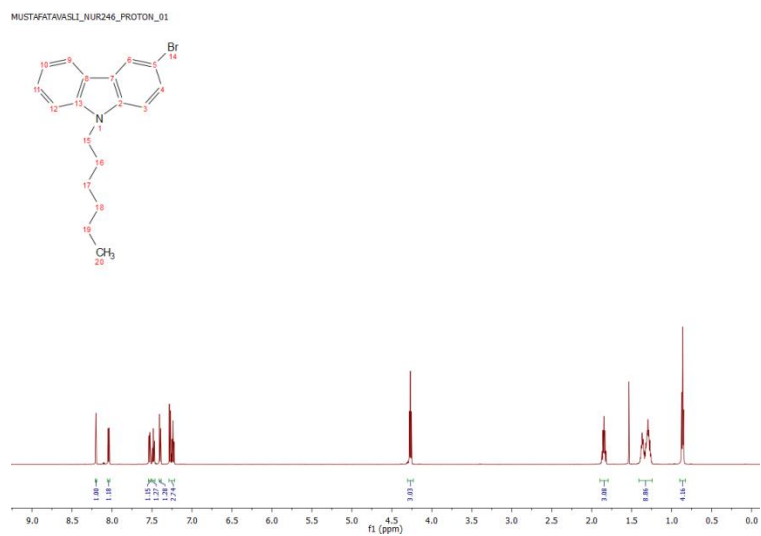

**Figure S2:**  $^1\text{H}$  NMR spectrum of 3-bromo-N-hexylcarbazole (4).

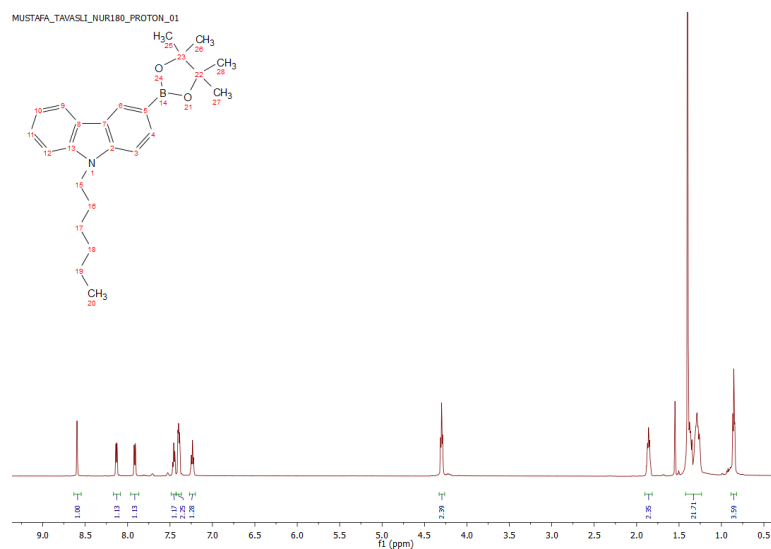

**Figure S3:**  $^1\text{H}$  NMR spectrum of *N*-hexylcarbazole-3-yl-boronic acid pinacol ester (5).

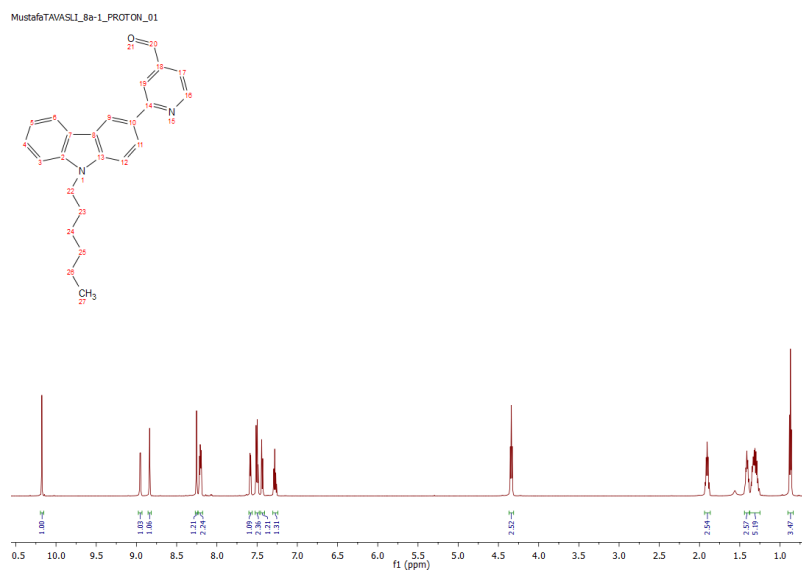

**Figure S4:**  $^1\text{H}$  NMR spectrum of compound 7a.

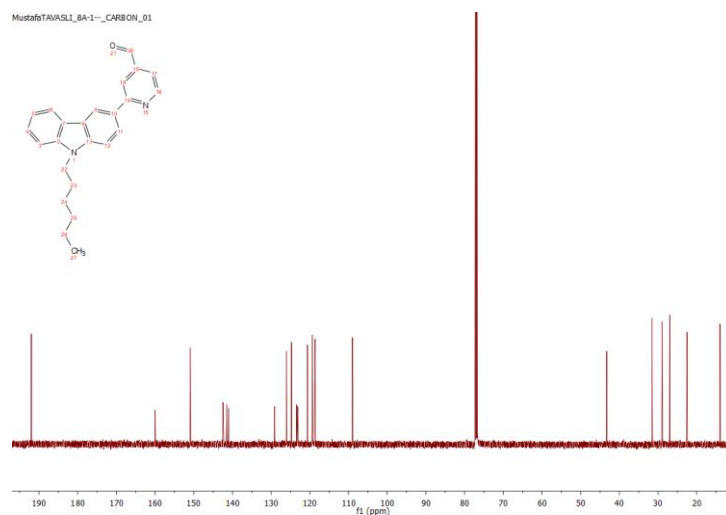

**Figure S5:**  $^{13}\text{C}$  NMR spectrum of compound 7a.

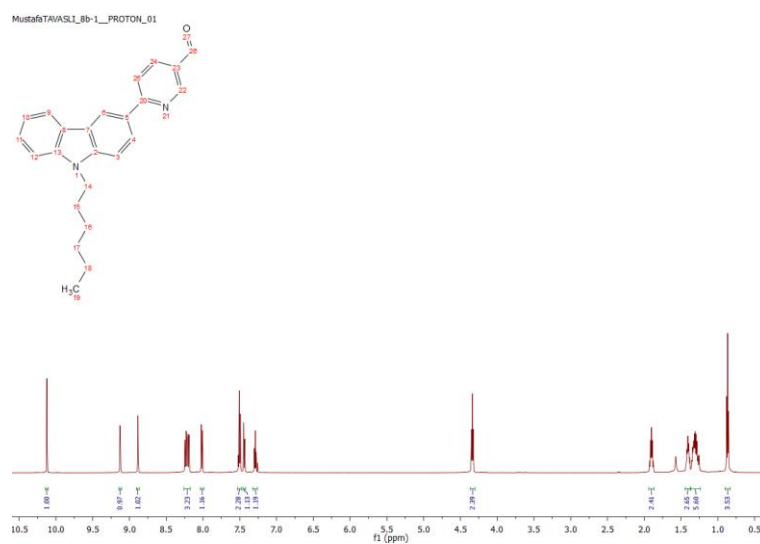

**Figure S6:**  $^1\text{H}$  NMR spectrum of compound 7b.

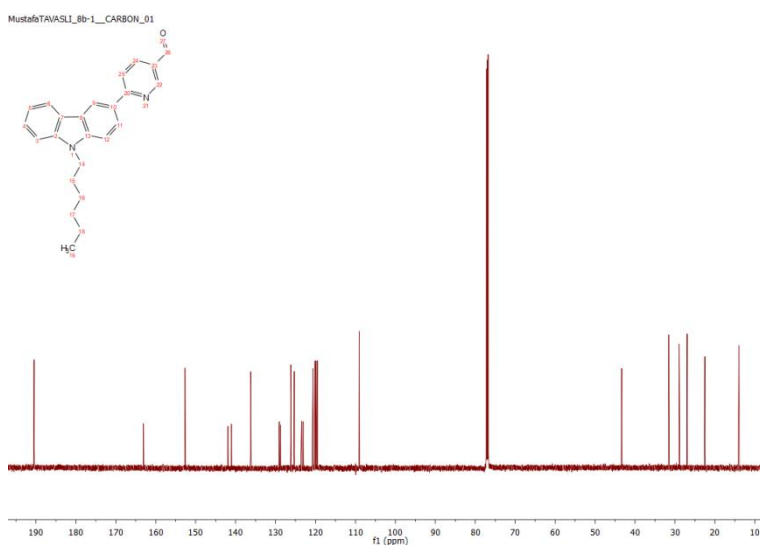

**Figure S7:**  $^{13}\text{C}$  NMR spectrum of compound 7b.

## 2. FTIR spectra

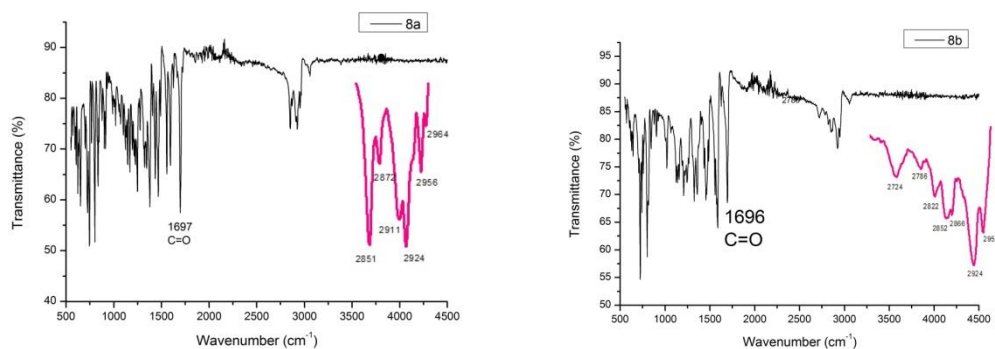

**Figure S8:** FTIR spectrum of compounds **7a** and **7b**

## 3. Mass and HRMS spectrum

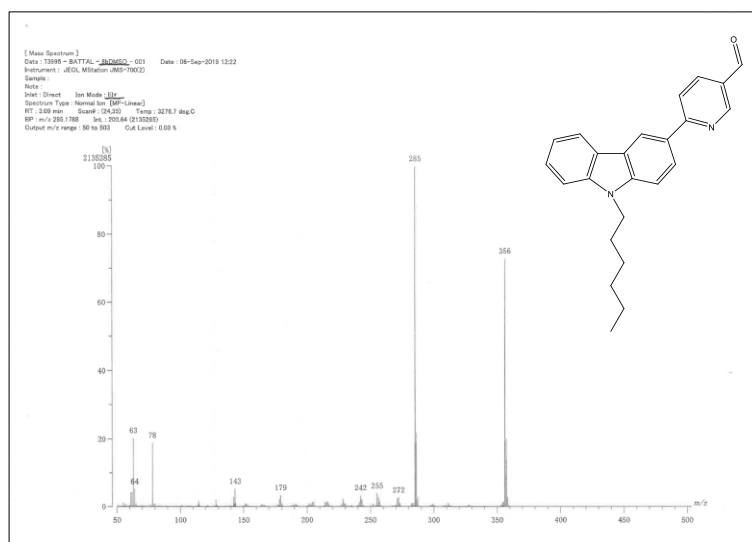

**Figure S9:** Mass spectrum of compound **7b**.

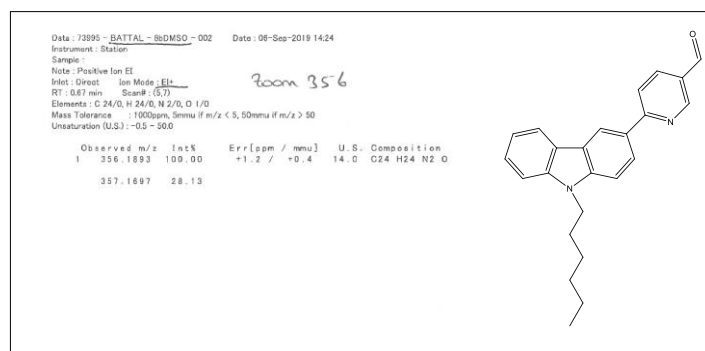

**Figure S10:** HRMS result of compound **7b**.

## 4. Calculations of relative fluorescence quantum yields

Relative fluorescent quantum yields of samples ( $\phi_s$ ) were calculated from Figure S11 by using equation 1, where  $y_s$  is the integrated fluorescence intensity of samples (**7a/7b**),  $y_R$  is the integrated fluorescence intensity of reference (Rhodamine B),  $n$  is the refractive index of solvents used.

$$\phi_s = y_s \cdot \frac{\phi_R}{y_R} \cdot \frac{n_s^2}{n_r^2} \quad (1)$$

Figure S11, plotted from Table S1, depicts absorption at 355 nm (OD, optical density) versus integrated emission (integrated fluorescence intensity of reference and samples).

For this, samples (**7a** and **7b**) were dissolved in dichloromethane ( $n = 1.435$ ) and reference (rhodamine B) was dissolved in absolute ethanol ( $n = 1.361$ ). Different concentrations of reference (C1–C7) and samples (**7a**: C1–C5 and **7b**: C1–C8) were then prepared. For each concentration absorption spectra of reference and samples were recorded as depicted in Figure S12. Both reference and samples were excited at 355 nm, then emission spectra of reference and samples were recorded as depicted in Figure S13. All of these values are summarised in Table S1.

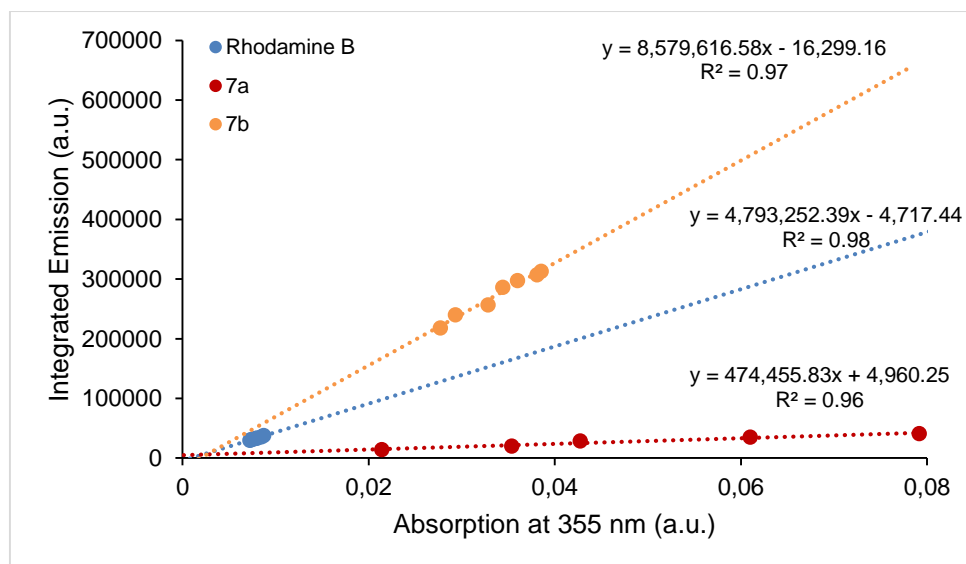

**Figure S11:** Absorption at 355 nm-integrated emission of samples (**7a** and **7b**) and reference (rhodamine B)

**Table S1: Optical density and integrated PL intensity values of reference (rhodamine B) and samples (7a and 7b)**

| Rhodamine B<br>( $\lambda_{\text{exc}}= 355 \text{ nm}$ ) |             |                                  | 7a<br>( $\lambda_{\text{exc}}= 355 \text{ nm}$ ) |             |                            | 7b<br>( $\lambda_{\text{exc}}= 355 \text{ nm}$ ) |             |                            |
|-----------------------------------------------------------|-------------|----------------------------------|--------------------------------------------------|-------------|----------------------------|--------------------------------------------------|-------------|----------------------------|
| Unsorted                                                  | OD<br>(a.u) | Integrated PL<br>intensity (a.u) | Unsorted                                         | OD<br>(a.u) | Integrated<br>PL intensity | Unsorted                                         | OD<br>(a.u) | Integrated<br>PL intensity |
| C1                                                        | 0.00873     | 37591.15917                      | C1                                               | 0.02143     | 14075.26276                | C1                                               | 0.03855     | 312854.9439                |
| C2                                                        | 0.00849     | 35459.07801                      | C2                                               | 0.03538     | 20063.43206                | C2                                               | 0.03810     | 307049.5385                |
| C3                                                        | 0.00804     | 33547.29896                      | C3                                               | 0.04274     | 28371.31840                | C3                                               | 0.03599     | 297563.9041                |
| C4                                                        | 0.00786     | 33095.41848                      | C4                                               | 0.06100     | 35022.74323                | C4                                               | 0.03441     | 286229.5682                |
| C5                                                        | 0.00762     | 31942.84488                      | C5                                               | 0.07916     | 41000.28228                | C6                                               | 0.03284     | 256749.5341                |
| C6                                                        | 0.00734     | 30932.30389                      |                                                  |             |                            | C7                                               | 0.02933     | 240013.4747                |
| C7                                                        | 0.00726     | 29668.39935                      |                                                  |             |                            | C8                                               | 0.02770     | 218127.6961                |
| Gradient=PL/OD                                            |             | 4,793,252.39                     | Gradient=PL/OD                                   |             | 474,455.83                 | Gradient=PL/OD                                   |             | 8,579,616.58               |
| Refractive index of ethanol                               |             | 1.361                            | Refractive index of dichloromethane              |             | 1.435                      | Refractive index of dichloromethane              |             | 1.435                      |
| PLQY                                                      |             | 0.49                             | PLQY                                             |             | 0.054                      | PLQY                                             |             | 0.974                      |
| Unit                                                      |             | 1.02227E-07                      | Estimated error on values ca. $\pm 10\%$ RSD.    |             |                            |                                                  |             |                            |

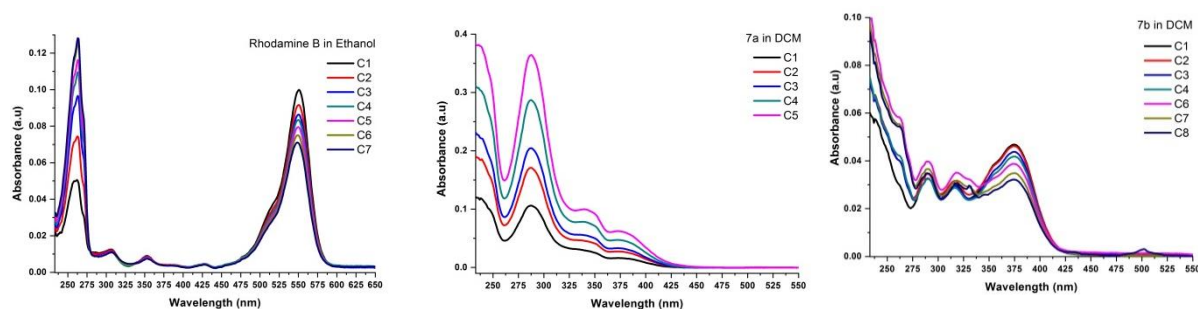

**Figure S12: Absorption spectra of rhodamine B, 7a and 7b.**

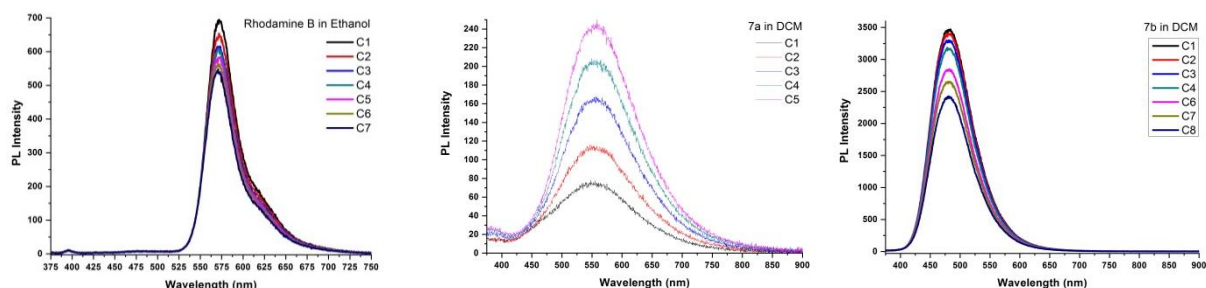

**Figure S13: Emission (PL) spectra of rhodamine B, 7a and 7b, excited at 355 nm.**
